# Supplementary material for: Targeting HIV-1 Env gp140 to LOX-1 Elicits Immune Responses in Rhesus Macaques
Source: PubMed Central journal article supplement (PMC4831750; doi:10.1371/journal.pone.0153484), 2016-04-14
Supplement: pone.0153484.s002.pdf [file pone.0153484.s002.pdf]

**Supplemental Fig. 2**

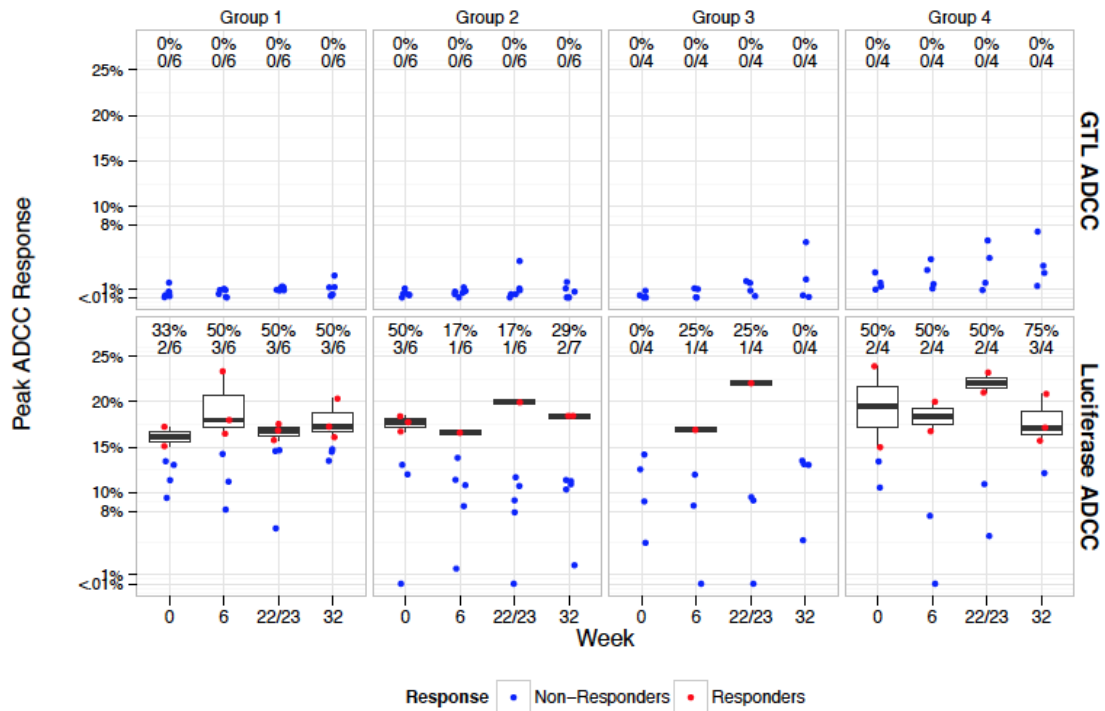

**ADCC-mediated antibody responses measured by GTL and Luciferase assays.** Response rates defined in the Materials and Methods are shown above the panels. Dots are data for individual animals and positive responses are shown in red, non-responses are shown in blue.
