# Supplementary material for: Targeting HIV-1 Env gp140 to LOX-1 Elicits Immune Responses in Rhesus Macaques
Source: PubMed Central journal article supplement (PMC4831750; doi:10.1371/journal.pone.0153484), 2016-04-14
Supplement: pone.0153484.s003.pdf [file pone.0153484.s003.pdf]

| Antibody | mAb Target       | Binding to Env gp140<br>$K_d$ / nM | Binding to $\alpha$ LOX-1. gp140<br>$K_d$ / nM |
|----------|------------------|------------------------------------|------------------------------------------------|
| HJ16     | CD4 binding site | 400 $\pm$ 38                       | 51 $\pm$ 16                                    |
| PGV04    | CD4 binding site | n.d.                               | 120 $\pm$ 32                                   |
| b6       | CD4 binding site | 1.8 $\pm$ 0.3                      | 39 $\pm$ 3.5                                   |
| 17b      | CD4-induced      | 1.6 $\pm$ 1.8                      | 36 $\pm$ 3.7                                   |
| 2G12     | Glycan           | 280 $\pm$ 50                       | 190 $\pm$ 4.8                                  |
| HGN194   | V3 loop          | 0.5 $\pm$ 0.4                      | 72 $\pm$ 8.1                                   |

### Supplemental Table 1.

**Reactivity of  $\alpha$ LOX-1.Env gp140 fusion protein versus anti-Env mAbs.** Microscale thermophoresis binding analysis of  $\alpha$ LOX-1.Env gp140 and matching trimeric Env gp140 protein was performed to measure the relative binding proficiency of a panel of mAbs (mean values of duplicate measurements are presented with calculated standard deviation).
