# Supplementary material for: Targeting HIV-1 Env gp140 to LOX-1 Elicits Immune Responses in Rhesus Macaques
Source: PubMed Central journal article supplement (PMC4831750; doi:10.1371/journal.pone.0153484), 2016-04-14
Supplement: pone.0153484.s004.pdf [file pone.0153484.s004.pdf]

|       |      | Serum ID50 Titer in TZM.bl cells (1/x) |             |             |             |              |  |            |            |            |              |
|-------|------|----------------------------------------|-------------|-------------|-------------|--------------|--|------------|------------|------------|--------------|
| Group | Week | Tier 1A (C)                            | Tier 1A (B) | Tier 1A (B) | Tier 1B (B) | Tier 1B (E)  |  | Tier 2 (C) | Tier 2 (C) | Tier 2 (C) | Neg. Control |
|       |      | MW965.26                               | MN-3        | SF162.LS    | BaL.26      | TH023.6      |  | TV1.21     | Ce1086_B2  | 96ZM651    | MuLV         |
| G1    | -3   | <20                                    | <20         | <20         | <20         | <20          |  | <20        | <20        | <20        | <20          |
|       | 22   | <b>1,626</b>                           | <20         | <20         | <20         | <b>584</b>   |  | <20        | <20        | <20        | <20          |
|       | 32   | <b>246</b>                             | <20         | <20         | <20         | <b>100</b>   |  | <20        | <20        | <20        | <20          |
| G1    | -3   | <20                                    | <20         | <20         | <20         | <20          |  | <20        | <20        | <20        | <20          |
|       | 22   | <b>553</b>                             | <20         | <20         | <20         | <b>310</b>   |  | <20        | <20        | <20        | <20          |
|       | 32   | <b>168</b>                             | <20         | <20         | <20         | <b>110</b>   |  | <20        | <20        | <20        | <20          |
| G1    | -3   | <20                                    | <20         | <20         | <20         | <20          |  | <20        | <20        | <20        | <20          |
|       | 22   | <b>2,414</b>                           | <20         | <20         | <20         | <b>39</b>    |  | <20        | <20        | <20        | <20          |
|       | 32   | <b>404</b>                             | <20         | <20         | <20         | <b>41</b>    |  | <20        | <20        | <20        | <20          |
| G1    | -3   | <20                                    | <20         | <20         | <20         | <20          |  | <20        | <20        | <20        | <20          |
|       | 22   | <b>395</b>                             | <20         | <20         | <20         | <b>27</b>    |  | <20        | <20        | <20        | <20          |
|       | 32   | <b>151</b>                             | <20         | <20         | <20         | <b>35</b>    |  | <20        | <20        | <20        | <20          |
| G1    | -3   | <20                                    | <20         | <20         | <20         | <20          |  | <20        | <20        | <20        | <20          |
|       | 22   | <b>302</b>                             | <20         | <20         | <20         | <b>36</b>    |  | <20        | <20        | <20        | <20          |
|       | 32   | <b>21</b>                              | <20         | <20         | <20         | <20          |  | <20        | <20        | <20        | <20          |
| G1    | -3   | <20                                    | <20         | <20         | <20         | <20          |  | <20        | <20        | <20        | <20          |
|       | 22   | <b>201</b>                             | <20         | <20         | <20         | <b>47</b>    |  | <20        | <20        | <20        | <20          |
|       | 32   | <b>37</b>                              | <20         | <20         | <20         | <20          |  | <20        | <20        | <20        | <20          |
| G2    | -3   | <20                                    | <20         | <20         | <20         | <b>44</b>    |  | <b>25</b>  | <20        | <20        | <b>25</b>    |
|       | 22   | <b>460</b>                             | <20         | <20         | <20         | <20          |  | <20        | <20        | <20        | <20          |
|       | 32   | <b>42</b>                              | <20         | <20         | <20         | <20          |  | <20        | <20        | <20        | <20          |
| G2    | -3   | <20                                    | <20         | <20         | <20         | <20          |  | <20        | <20        | <20        | <20          |
|       | 22   | <b>454</b>                             | <20         | <20         | <20         | <b>1,792</b> |  | <20        | <20        | <20        | <20          |
|       | 32   | <b>73</b>                              | <20         | <20         | <20         | <b>268</b>   |  | <20        | <20        | <20        | <20          |
| G2    | -3   | <20                                    | <20         | <20         | <20         | <20          |  | <b>25</b>  | <20        | <20        | <20          |
|       | 22   | <b>1,146</b>                           | <20         | <20         | <20         | <b>158</b>   |  | <20        | <20        | <20        | <20          |
|       | 32   | <b>243</b>                             | <20         | <20         | <20         | <b>55</b>    |  | <20        | <20        | <20        | <20          |
| G2    | -3   | <20                                    | <20         | <20         | <20         | <20          |  | <20        | <20        | <20        | <20          |
|       | 22   | <b>495</b>                             | <20         | <20         | <20         | <20          |  | <20        | <20        | <20        | <20          |
|       | 32   | <b>82</b>                              | <20         | <20         | <20         | <20          |  | <20        | <20        | <20        | <20          |
| G2    | -3   | <20                                    | <20         | <20         | <20         | <20          |  | <20        | <20        | <20        | <20          |
|       | 22   | <b>154</b>                             | <20         | <20         | <20         | <20          |  | <20        | <20        | <20        | <20          |
|       | 32   | <b>24</b>                              | <20         | <20         | <20         | <20          |  | <20        | <20        | <20        | <20          |
| G2    | -3   | <20                                    | <20         | <20         | <20         | <20          |  | <20        | <20        | <20        | <20          |
|       | 22   | <b>521</b>                             | <20         | <20         | <20         | <20          |  | <20        | <20        | <b>27</b>  | <20          |
|       | 32   | <b>141</b>                             | <20         | <20         | <20         | <20          |  | <20        | <20        | <20        | <20          |
| G3    | -3   | <20                                    | <20         | <20         | <20         | <20          |  | <20        | <20        | <20        | <20          |
|       | 22   | <b>34</b>                              | <20         | <20         | <20         | <20          |  | <20        | <20        | <20        | <20          |
|       | 32   | <b>208</b>                             | <20         | <20         | <20         | <20          |  | <20        | <20        | <20        | <20          |
| G3    | -3   | <20                                    | <20         | <20         | <20         | <20          |  | <20        | <20        | <20        | <20          |
|       | 22   | <b>194</b>                             | <20         | <20         | <20         | <b>20</b>    |  | <20        | <20        | <20        | <20          |
|       | 32   | <b>360</b>                             | <20         | <20         | <20         | <b>30</b>    |  | <20        | <20        | <20        | <20          |
| G3    | -3   | <20                                    | <20         | <20         | <20         | <20          |  | <b>21</b>  | <20        | <20        | <20          |
|       | 22   | <b>81</b>                              | <20         | <20         | <20         | <20          |  | <20        | <20        | <20        | <20          |
|       | 32   | <b>202</b>                             | <b>21</b>   | <20         | <20         | <20          |  | <20        | <20        | <b>25</b>  | <20          |
| G3    | -3   | <20                                    | <20         | <20         | <20         | <20          |  | <20        | <20        | <20        | <20          |
|       | 22   | <b>1,041</b>                           | <20         | <20         | <20         | <20          |  | <20        | <20        | <20        | <20          |
|       | 32   | <b>444</b>                             | <20         | <20         | <20         | <20          |  | <20        | <20        | <20        | <20          |
| G4    | -3   | <20                                    | <20         | <20         | <20         | <20          |  | <20        | <20        | <20        | <20          |
|       | 22   | <b>95</b>                              | <20         | <20         | <20         | <20          |  | <20        | <20        | <20        | <20          |
|       | 32   | <b>894</b>                             | <b>34</b>   | <20         | <20         | <b>265</b>   |  | <20        | <20        | <20        | <20          |
| G4    | -3   | <20                                    | <20         | <20         | <20         | <20          |  | <20        | <20        | <20        | <20          |
|       | 22   | <b>166</b>                             | <20         | <20         | <20         | <20          |  | <20        | <20        | <20        | <20          |
|       | 32   | <b>300</b>                             | <20         | <20         | <20         | <20          |  | <20        | <20        | <20        | <20          |
| G4    | -3   | <b>29</b>                              | <20         | <20         | <20         | <b>23</b>    |  | <20        | <20        | <20        | <20          |
|       | 22   | <b>36</b>                              | <20         | <20         | <20         | <b>123</b>   |  | <20        | <20        | <20        | <20          |
|       | 32   | <b>97</b>                              | <20         | <20         | <20         | <b>158</b>   |  | <20        | <20        | <20        | <20          |
| G4    | -3   | <20                                    | <20         | <20         | <20         | <20          |  | <20        | <20        | <20        | <20          |
|       | 22   | <b>115</b>                             | <20         | <20         | <20         | <b>22</b>    |  | <20        | <20        | <20        | <20          |
|       | 32   | <b>403</b>                             | <b>60</b>   | <20         | <20         | <b>56</b>    |  | <20        | <20        | <20        | <20          |

**Supplemental Table 2. Viral neutralization assay using TZM.bl cells using Tier 1 and Tier 2 HIV-1 Env pseudoviruses. Samples were tested as primary serum 1:20 titrated 3-fold 7x (duplicate wells). Values are the serum dilution at which relative luminescence units (RLUs) were reduced 50% compared to virus control wells (no test sample). Values in bold type scored positive for neutralization based on the criterion of > 3X the observed background in the pre-bleed.**
