# Supplementary material for: Targeting HIV-1 Env gp140 to LOX-1 Elicits Immune Responses in Rhesus Macaques
Source: PubMed Central journal article supplement (PMC4831750; doi:10.1371/journal.pone.0153484), 2016-04-14
Supplement: pone.0153484.s005.pdf [file pone.0153484.s005.pdf]

| Group | Week | Curve-based IC50 in A3R5.7 Cells <sup>1,2</sup> |                         |                       |                         |                         |
|-------|------|-------------------------------------------------|-------------------------|-----------------------|-------------------------|-------------------------|
|       |      | TV1.21.LucR.T2A.ecto                            | Ce1086_B2.LucR.T2A.ecto | Du151.2.LucR.T2A.ecto | Ce1176_A3.LucR.T2A.ecto | Ce2010_F5.LucR.T2A.ecto |
|       |      | ID#5069                                         | ID#4577                 | ID#5352               | ID#5330                 | ID#5479                 |
| G1    | -3   | <20                                             | <20                     | <20                   | <20                     | 21                      |
|       | 22   | <b>47</b>                                       | <20                     | <20                   | <b>21</b>               | 29                      |
|       | 32   | <b>23</b>                                       | <20                     | <20                   | <20                     | 23                      |
| G1    | -3   | <20                                             | <20                     | <20                   | <20                     | 27                      |
|       | 22   | <b>63</b>                                       | <b>42</b>               | <20                   | <b>21</b>               | 59                      |
|       | 32   | <b>25</b>                                       | <b>27</b>               | <20                   | <20                     | <20                     |
| G1    | -3   | <20                                             | <20                     | <20                   | <20                     | <20                     |
|       | 22   | <b>57</b>                                       | <20                     | <20                   | <20                     | <20                     |
|       | 32   | <b>38</b>                                       | <b>24</b>               | <20                   | <20                     | <20                     |
| G1    | -3   | 28                                              | <20                     | <20                   | 24                      | <20                     |
|       | 22   | 35                                              | <20                     | <20                   | <20                     | <20                     |
|       | 32   | 31                                              | <b>21</b>               | <20                   | <20                     | <20                     |
| G1    | -3   | 26                                              | <20                     | <20                   | <20                     | <20                     |
|       | 22   | 59                                              | <20                     | <20                   | <b>24</b>               | <b>33</b>               |
|       | 32   | <20                                             | <20                     | <20                   | <20                     | <20                     |
| G1    | -3   | <20                                             | <20                     | <20                   | <20                     | <20                     |
|       | 22   | <b>36</b>                                       | <20                     | <20                   | <20                     | <b>22</b>               |
|       | 32   | <b>20</b>                                       | <20                     | <20                   | <20                     | <b>22</b>               |
| G2    | -3   | <20                                             | <20                     | <20                   | <20                     | <20                     |
|       | 22   | <b>55</b>                                       | <b>57</b>               | <20                   | <b>28</b>               | <b>38</b>               |
|       | 32   | <20                                             | <20                     | <20                   | <20                     | <b>22</b>               |
| G2    | -3   | <20                                             | <20                     | <20                   | <20                     | 23                      |
|       | 22   | <b>39</b>                                       | <20                     | <20                   | <20                     | <20                     |
|       | 32   | <20                                             | <20                     | <20                   | <20                     | 20                      |
| G2    | -3   | <20                                             | <20                     | <20                   | <20                     | 29                      |
|       | 22   | <b>48</b>                                       | <20                     | <20                   | <20                     | 21                      |
|       | 32   | <20                                             | <20                     | <20                   | <20                     | <20                     |
| G2    | -3   | <20                                             | <20                     | <20                   | <20                     | <20                     |
|       | 22   | <b>26</b>                                       | <20                     | <20                   | <20                     | <b>22</b>               |
|       | 32   | <20                                             | <20                     | <20                   | <20                     | <b>27</b>               |
| G2    | -3   | <20                                             | <20                     | <20                   | <20                     | <20                     |
|       | 22   | <b>25</b>                                       | <20                     | <20                   | <20                     | <b>28</b>               |
|       | 32   | <b>28</b>                                       | <b>21</b>               | <20                   | <20                     | <b>26</b>               |
| G2    | -3   | 32                                              | <20                     | <20                   | 23                      | 23                      |
|       | 22   | <b>124</b>                                      | <b>62</b>               | <b>22</b>             | 37                      | 44                      |
|       | 32   | 34                                              | <20                     | <20                   | <20                     | <20                     |
| G3    | -3   | <20                                             | <20                     | <20                   | <20                     | <20                     |
|       | 22   | <20                                             | <20                     | <20                   | <20                     | <20                     |
|       | 32   | <20                                             | <20                     | <20                   | <20                     | <20                     |
| G3    | -3   | 24                                              | <20                     | <20                   | <20                     | <20                     |
|       | 22   | 39                                              | <20                     | <20                   | <b>26</b>               | <b>20</b>               |
|       | 32   | 50                                              | <20                     | <20                   | <20                     | <b>29</b>               |
| G3    | -3   | 24                                              | <20                     | <20                   | <20                     | <20                     |
|       | 22   | 51                                              | <20                     | <20                   | <b>30</b>               | <b>34</b>               |
|       | 32   | 51                                              | <20                     | <20                   | <20                     | <20                     |
| G3    | -3   | 24                                              | <20                     | 23                    | 31                      | 22                      |
|       | 22   | <b>82</b>                                       | <20                     | <20                   | 23                      | 25                      |
|       | 32   | 58                                              | <20                     | <20                   | <20                     | <20                     |
| G4    | -3   | 25                                              | <20                     | <20                   | <20                     | <20                     |
|       | 22   | 26                                              | <20                     | <20                   | <20                     | <b>29</b>               |
|       | 32   | 49                                              | <b>22</b>               | <20                   | <20                     | <b>23</b>               |
| G4    | -3   | <20                                             | <20                     | <20                   | <20                     | <20                     |
|       | 22   | <b>28</b>                                       | <20                     | <20                   | <20                     | <20                     |
|       | 32   | <b>32</b>                                       | <20                     | <20                   | <20                     | <20                     |
| G4    | -3   | 43                                              | <20                     | <20                   | <20                     | <20                     |
|       | 22   | <20                                             | <b>21</b>               | <20                   | <20                     | <20                     |
|       | 32   | 23                                              | <20                     | <20                   | <20                     | <20                     |
| G4    | -3   | 55                                              | <20                     | 23                    | 51                      | <20                     |
|       | 22   | 67                                              | <20                     | 21                    | 39                      | <20                     |
|       | 32   | 107                                             | <b>66</b>               | 34                    | 35                      | <b>24</b>               |

**Supplemental Table 3. Viral neutralization assay using A3R5.7 cells using Env.IMC.LucR viruses made by transfection in 293T cells.** <sup>1</sup>Values are the serum dilution at which relative luminescence units (RLUs) were reduced 50% compared to virus control wells (no test sample). <sup>2</sup>Values in bold type scored positive for neutralization based on the criterion of > 3X the observed background in the pre-bleed.
